# Supplementary material
Source: publisher site journal article supplement (https://www.dovepress.com/article/280285)

**Supplementary Figure 1: Flow chart of the animal experiment procedures.**

- No treatment was given to the blank control group.
- The other mice drank 4NQO water for 16 weeks.
- Examine total body weight of the mice weekly.
- The experimental groups were intragastrically administered every other day.
- The model control group was intragastrically administered with the same dose of corn oil.
- Stop drinking 4NQO water.
- Stop intragastric administration.
- Euthanize all mice.
- Extracted the tongue, liver, kidney, and spleen.

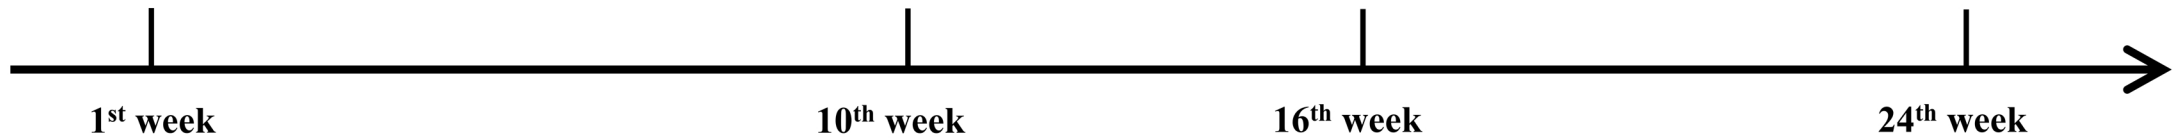

Supplement: Supplementary file 1 [file get_supplementary_file.php]
